# Supplementary material for: H2O2 as a candidate bottleneck for MnP activity during cultivation of Agaricus bisporus in compost
Source: PubMed Central journal article supplement (PMC5474230; doi:10.1186/s13568-017-0424-z), 2017-06-17
Supplement: 13568_2017_424_MOESM1_ESM.pdf [file 13568_2017_424_MOESM1_ESM.pdf]

## **Additional File 1**

### **AMB Express**

#### **H<sub>2</sub>O<sub>2</sub> as a candidate bottleneck for MnP activity during cultivation of *Agaricus bisporus* in compost**

Aurin M. Vos<sup>1</sup>, Edita Jurak<sup>2</sup>, Jordi F. Pelkmans<sup>1</sup>, Koen Herman<sup>1</sup>, Gill Pels<sup>2</sup>, Johan J. Baars<sup>3</sup>, Ed Hendrix<sup>3</sup>, Mirjam A. Kabel<sup>2</sup>, Luis G. Lugones<sup>1</sup>, Han A. B. Wösten<sup>1\*</sup>

<sup>1</sup>Microbiology, Department of Biology, Utrecht University, Padualaan 8, 3584 CH Utrecht, The Netherlands;

<sup>2</sup>Wageningen University, Laboratory of Food Chemistry, Bornse Weilanden 9, 6708 WG, Wageningen, The

Netherlands; <sup>3</sup>Plant Breeding, Wageningen University and Research Centre, 6700 AJ Wageningen, The Netherlands

\*Corresponding author

Prof. dr. Han A.B. Wösten

Department of Microbiology, Utrecht University

Padualaan 8, 3584 CH Utrecht

The Netherlands

Telephone: 31 30 2533448

Fax: 31 30 2513655

E-mail: [h.a.b.wosten@uu.nl](mailto:h.a.b.wosten@uu.nl)

**Table S1:** Primers used in this study.

| <b>Primer</b> | <b>Primer name</b> | <b>Sequence</b>                           |
|---------------|--------------------|-------------------------------------------|
| <b>1</b>      | Actin prmtr F      | AAGCTTAGCCGAGAGAAGATGCCCC                 |
| <b>2</b>      | Actin prmtr R      | CCATGGTTTGTATTTCGTGTGTTTCG                |
| <b>3</b>      | Actin trmnr F      | GGATCCGCTGATGGTGCTTTATGATAAATAAAGTCCTTGGG |
| <b>4</b>      | Actin trmnr R      | GAATTCTACTACTACCCCCAAAACCGACATCATCC       |
| <b>5</b>      | Act-Pr_F_infu      | CCAGGGGGATCGTTAAAGCTTAGCCGAGAGAAG         |
| <b>6</b>      | Act-Ter_R_infu     | CGCCGAATTGGCGCGGAATTCTACTACTACCCCC        |

**Table S2:** Statistical differences over time in MnP and Lcc activity and chitin content in compost as presented in Figure 2. Time points sharing a letter are not significantly different (ANOVA with Bonferroni post hoc test,  $p < 0.05$ ).

|                        | A15 |     |        | MnP1-1 |     |        |
|------------------------|-----|-----|--------|--------|-----|--------|
|                        | MnP | Lcc | Chitin | MnP    | Lcc | Chitin |
| <b>PII</b>             | -   | -   | A      | -      | -   | A      |
| <b>Casing</b>          | A   | A   | AB     | A      | A   | AB     |
| <b>Venting</b>         | B   | B   | BC     | B      | B   | BC     |
| <b>After 2nd flush</b> | C   | C   | C      | C      | C   | C      |

**Table S3:** Relative abundance of lignin residues as percentage of total molar area as presented in Figure 3. Standard deviations are indicated between brackets.

|                  |               | <b>G-residues</b> |                         |                       |                        |                 |                         |                       |                        |
|------------------|---------------|-------------------|-------------------------|-----------------------|------------------------|-----------------|-------------------------|-----------------------|------------------------|
|                  |               | <b>Guaiacol</b>   | <b>4-methylguaiacol</b> | <b>Ethyl-guaiacol</b> | <b>4-vinylguaiacol</b> | <b>Vanillin</b> | <b>Trans-isoeugenol</b> | <b>Acetovanillone</b> | <b>Guaiacylacetone</b> |
|                  | <b>WS</b>     | 22 (4)            | 2.8 (0.5)               | 1.9 (0.5)             | 37.4 (6.4)             | 3.5 (0.7)       | 2 (0.5)                 | 1.2 (0.3)             | 2.8 (0.6)              |
|                  | <b>PII</b>    | 24.5 (1.4)        | 3.3 (0.3)               | 2.1 (0.4)             | 32.9 (2.9)             | 2.3 (0.2)       | 3.4 (0.2)               | 1.7 (0.2)             | 2.3 (0.2)              |
| <b>Casing</b>    | <b>A15</b>    | 26.6 (5.4)        | 2.9 (0.8)               | 1.9 (0.6)             | 23.2 (6.2)             | 4.6 (1)         | 2.9 (1)                 | 4.2 (0.7)             | 3.1 (0.8)              |
|                  | <b>MnP1-1</b> | 26.7 (5.6)        | 2.8 (0.7)               | 1.9 (0.4)             | 22.4 (5)               | 4.6 (0.9)       | 2.8 (0.6)               | 4.3 (0.9)             | 3.1 (0.6)              |
| <b>Venting</b>   | <b>A15</b>    | 31.7 (3.6)        | 2.5 (0.4)               | 1.7 (0.3)             | 15.9 (1.9)             | 4.9 (0.6)       | 2.2 (0.3)               | 5.4 (0.5)             | 3.3 (0.4)              |
|                  | <b>MnP1-1</b> | 31.9 (1.6)        | 2.5 (0.2)               | 1.8 (0.2)             | 15.5 (1)               | 5 (0.4)         | 2.2 (0.2)               | 5.3 (0.3)             | 3.3 (0.2)              |
| <b>After 2nd</b> | <b>A15</b>    | 35.3 (2.9)        | 2 (0.2)                 | 1.7 (0.2)             | 13.6 (1.1)             | 6 (0.4)         | 1.7 (0.1)               | 6.2 (0.3)             | 3.1 (0.2)              |
|                  | <b>MnP1-1</b> | 35.3 (2.8)        | 2 (0.2)                 | 1.6 (0.2)             | 13.4 (1.5)             | 6 (0.8)         | 1.8 (0.3)               | 6.4 (0.8)             | 3.3 (0.4)              |

  

|                  |               | <b>S-residues</b> |                         |                        |                       |                        |                       |                        |
|------------------|---------------|-------------------|-------------------------|------------------------|-----------------------|------------------------|-----------------------|------------------------|
|                  |               | <b>Syringol</b>   | <b>4-methylsyringol</b> | <b>4-vinylsyringol</b> | <b>Syringaldehyde</b> | <b>4-Allylsyringol</b> | <b>Acetosyringone</b> | <b>Syringylacetone</b> |
|                  | <b>WS</b>     | 10 (1.8)          | 1.3 (0.3)               | 8.1 (1.5)              | 1.4 (0.2)             | 2.1 (0.4)              | 1.8 (0.4)             | 1.8 (0.3)              |
|                  | <b>PII</b>    | 10.2 (1.5)        | 1.3 (0.1)               | 8.5 (1.5)              | 1.2 (0.2)             | 3 (0.3)                | 2 (0.1)               | 1.5 (0.2)              |
| <b>Casing</b>    | <b>A15</b>    | 12.8 (2.6)        | 1.2 (0.3)               | 6.6 (1.3)              | 1.6 (0.3)             | 2.6 (0.5)              | 3.7 (0.7)             | 2.1 (0.4)              |
|                  | <b>MnP1-1</b> | 13.2 (2.8)        | 1.3 (0.3)               | 6.5 (1.3)              | 1.7 (0.3)             | 2.6 (0.5)              | 3.8 (0.7)             | 2.3 (0.4)              |
| <b>Venting</b>   | <b>A15</b>    | 15.4 (1.9)        | 1.1 (0.2)               | 5.2 (0.6)              | 1.7 (0.2)             | 2 (0.2)                | 4.3 (0.4)             | 2.6 (0.3)              |
|                  | <b>MnP1-1</b> | 15.6 (1.1)        | 1.2 (0.1)               | 5.1 (0.5)              | 1.6 (0.1)             | 2 (0.1)                | 4.4 (0.3)             | 2.6 (0.2)              |
| <b>After 2nd</b> | <b>A15</b>    | 14.8 (1.4)        | 0.8 (0.1)               | 4.4 (0.2)              | 2 (0.2)               | 1.7 (0.1)              | 4.2 (0.3)             | 2.6 (0.2)              |
|                  | <b>MnP1-1</b> | 14.3 (1.7)        | 0.8 (0.1)               | 4.2 (0.6)              | 2.1 (0.2)             | 1.7 (0.2)              | 4.5 (0.5)             | 2.6 (0.3)              |

**Text 1:** Nucleotide sequence of the adapted *mnp1* over-expressed in *A. bisporus*.

CCATGGCTTTCAA AATTCTTCTCAGCCTTATTTTGGCTTTGAACGCCGTCCAATTTATTGCTGGTAC  
GCACTTTACTCATATCCTCATATTATTTGCCGACAAGTCAACGATGTAGCTGTTCCCTACCAGGAGG  
GCGCAATGTGCCGATGGCACCACTGTTTTCTAATGAGGCCTGTTGCGTTCCTGCCATTATAGCA  
GATATCCAGCCGAACTTGTTTCGAAAACGAGTGCGGTGAAGAGGTAATGATTTAATTTTTTGATAGA  
GTTACGATATTCAACAGCATATTTATACTTTAGGTCCATGAAACCTTGCGGGCATTATTCATGATG  
CTATCGGATTCTCCAGAGCAGCTGGGTAGGTTCTGACTGTCTGTGGCGGCAGCTAGTATCGCTAAA  
ATGATTTCCAGTGGTGGTGGTGTCTGATGGTTCTCTCGTCACTTTTCGGCGATGTGGAGACGACATTT  
GCCGCTAACGCAGGAATCGACGAGATTGTAGAGACATTACGACCTTTTATAAACAGCCACAACAT  
CAGTGCCGGCGATTTGTGAGCCTGGACTCATAATCTGTGTTGCATCCTGTTAACGCTCTTCCTAGCA  
TCCAGTTTGCAACCGTTGTTGGATTGACCAACTGCCCCGGCGCACCTCGCATACCCTTTTTCTTAGG  
CCGCCAGACGCTACCGCCGCTTCCCCCGATGGTCTTGTCCCTGAGCCCTTCGGTCAGTCTCTCATC  
AGCCTTTCCGGTATAATCTACAACCCAAGTTGATAATCAACAGATTCCGTCACGAAAATTCTTGAA  
CGCTTCGATGATGCTGGTTTTACCCCCACTGAAGTTGTTGCATTGCTTGCATCGTGAGTCTCTAGAA  
CAAGATCGAGAAATATGTGTCCAATCCCCCGTAGTCATACTGTTCGAGCTTCGGACACTATTGAG  
CCCGGTGTAAGTTTATTTCTTCGTCAGTATGCATTCTCATCTCATGAGCACCTTATTCCAGCTCGAA  
GGTAAGACATTCCTATCAATAAGAAACGTCTCAGTATCCAACGCAACCTCTAGTGTCCCCTTCG  
ACTCGACTCCCGGAGAATTTGACAGGCAGTTCTTTATCGAGACTATGCTTAAAGGCACTTCCTTCC  
CAGGGTAAGTAGTTCGTTGACATTCGTTACGCATCCTAATTTTGGCAAAGCACTGGGGGGAACCAA  
GGTGAAGCCTTATCTCCCTTGCCGGGAGAACTTCGTCTCGAATCCGATGGACTTGTACGTATACAG  
TCTTTTGTGTCTGAATTTGTGATTGTTAACATTATTTATCATTAGTTGGCTCGAGGTCTGTCTTGCT  
AACAAAAGGCATCTGATAACATTGAAGGACTAACTTCATCATAGATGAACGAACCGCATGTGACT  
GGCAACTCTTCGCTAGTAAGAATGTTTGCCAACCAAGAAGAATAGCTCACCTAAAATTCCACGATA  
GCAGATCAACAAAAAATGGCATCGGCATTTAGCGACGCGATGGTCAAACCTGTCTCTCGTCGGGCA  
AGATAAGAGCCAGTTGATTGATTGTTTCAGACGTCATTCCGCGAACGATCCCTTTGACAAATGAACC  
ATACTTCCCTGCCGACTTGACCAAAGATGATCTTGAGCAGACCGTGAGTCCAATAGACATTCACAA  
TACGATTTCCACTCTGAGCCTGCTTGTTTTTGATACAGTGCCCGGATGAATTCCTGATTACCCTTC  
CAACCCCAGTGTCACTTCGGTCGCGCCAGTGTAAGTTTATGAACAGCTCCAGACGTCTGCTCTTAT  
TCACTCTGCGCAAATATCTAGTCCCACCTCGTAAGGATCC

**Text 2:** Amino acid sequence of adapted *mnp1* over-expressed in *A. bisporus*.

MAFKILLSLILALNAVQFIAAVPTRRAQCADGTTVSNEACCVLLPIIADIQ  
PNLFENECGEEVHETLRASFHDAIGFSRAAGGGGADGSLVTFGDVETTF  
ANAGIDEIVETLRPFINSHNISAGDFIQFATVVGLTNCPGAPRIPFFLGRPD  
ATAASPDGLVPEPFDSVTKILERFDDAGFTPTEVVALLASHTVAASDTIEP  
GLEGVPFDPSTPGEFDRQFFIETMLKGTSPGTGGNQGEALSPLPGELRLES  
DGLLARDERTACDWQLFATDQQKMASAFSDAMVKLSLVGQDKSQLIDC  
SDVIPRTIPLTNEPYFPADLTKDDLEQTCPDEFDPDYPSNPSVTSVAPVPTS
